# Parasitoid pressures and silence evolution

Megha R. Suswaram<sup>1\*</sup>, Justin D. Yeakel<sup>2</sup>

Chaitanya S. Gokhale<sup>3</sup>

<sup>1</sup>Quantitative Systems Biology, University of California Merced,

<sup>2</sup>Life and Environmental Sciences, University of California Merced,

<sup>3</sup>Research Group for Theoretical Models of Eco-evolutionary Dynamics,

Department of Evolutionary Theory, Max Planck Institute for Evolutionary Biology

\*Corresponding author: [msuswaram@ucmerced.edu](mailto:msuswaram@ucmerced.edu)

## Abstract

Acoustic signals used by organisms to attract mates are known to attract parasitoid flies. The parasitoid flies lay their eggs inside the host signaler, eventually killing the host. We build a host-parasitoid acoustic model to investigate the effect of parasitoid flies on the signalling host's eco-evolutionary dynamics. We used field crickets as a system to build the framework of the model. We explore how the sex ratio and the female parasitoid fecundity impact the evolution of the acoustic signal and population density of the signalling hosts. We also explore the stability of the host populations with an increase in parasitoid load. We find that up to a threshold value, an increase in parasitoid load leads to a thriving yet silent host population. Consistent with field observations, we show how this emergence of silence as an evolutionary strategy is immediate. Our results show that a drastic increase in the parasitoid load can rapidly push the signalling host population towards instability and extinction.

Keywords: acoustic signal, singing crickets, parasitism, reproduction, eco-evolutionary dynamics

## Introduction

Acoustic signalling is the primary mode of communication shared by roughly 8.7 million species ranging from arthropods to mammals [1], inhabiting terrestrial and marine environments. Acoustically signalling species are incredibly diverse, from crickets, anurans, and birds to several marine organisms. The reproductive fitness can be attributed to the mating success of the individual signalers in many acoustically signalling species [2–4]. A consistent life-history trade-off is the one between reproduction and survival effects.

26 This trade-off determines the evolution of the signalling trait whether visual [5], chemical  
27 [6] or indeed acoustic acoustic [7, 8]. Signalling populations evolve to amplify or diminish  
28 their conspicuousness based on their natural chorus and other environmental pressures [9–12].  
29 Many organisms solely use acoustic signals to secure mates. In most of these systems, the  
30 acoustic signals transmit mating opportunities with the females approaching the calling males  
31 to copulate [13]. Females cue into the signal, with some species performing phonotaxis, and  
32 locate the male. The females assess the song to assess the quality of the male [14].

33 Conspicuous sexual signallers, however, also garner unwanted attention. The signals risk  
34 attracting potential predators, and exploiters [15]. Male field crickets (*Gryllus campestris*) use  
35 stridulation to produce the chirp by rubbing their front wings together against the underneath  
36 of their wing, called the scraper [16]. The parasitoid flies (*Euphasiopteryx ochracea*) locate  
37 the signalling males by eavesdropping on their song by cuing in on the sound produced by the  
38 stridulation [17, 18]. The female fly then places larvae on the cricket that then burrow into the  
39 cricket's body cavity [19]. They develop there for seven to ten days before emerging. Some  
40 parasitoid females show specificity to particular host species [15]. Studies have shown that  
41 males switch their mate securing strategies and resort to alternative mating strategies when  
42 there is an increased risk of parasitism or can even lose the signalling ability altogether [20].  
43 Both polymorphism and plasticity has been observed in cricket populations [21, 22]. With  
44 increased parasitoid densities, male singing crickets have evolved to become silent [23]. The  
45 males develop flat wings which are incapable of producing a song. The silent males still have  
46 a chance at reproduction, as they become satellite males of the few signalling males in the  
47 population. They steal the mates from these signalling males. Additionally, added ecological  
48 pressures, compound with parasitoid population density, sex ratio, and fecundity to change  
49 the course of host signal evolution [24]. Furthermore, population dynamics create a feedback  
50 process that controls the reproduction and mortality rates, thus changing the evolutionary tra-  
51 jectory of sexual signals [25]. As a culmination of all the confounding factors, the evolutionary  
52 loss of the signalling traits can be remarkably rapid, in less than twenty generations, where the  
53 population becomes largely silent with a few signalers and many satellite males [23, 26].

54 Numerous studies focus on the evolutionary significance of parasitoid exploiters and their  
55 acoustically signalling insect hosts, such as the above-described crickets [27]. However, a  
56 quantitative estimate of the exact parasitoid densities, the proportion of parasitoid females, and  
57 other environmental pressures influencing the speed of signal loss are lacking. The existing  
58 host-parasitoid models predict the population dynamics as a version of the classical predator-  
59 prey cycles. We develop a theoretical model specific to such an extraordinary host-parasitoid  
60 system by incorporating reproductive costs and benefits of the acoustic signal.

61 Our mechanistic eco-evolutionary model goes beyond classical evolutionary game-theoretic

62 reasoning that invokes negative frequency dependence. Specifically, we focus on the parasitoid  
63 sex-ratio and the parasitoid fecundity's influence on the acoustic signal evolution and the host  
64 population density dynamics. We find a threshold parasitoid load at which there is a rapid evo-  
65 lutionary transition from conspicuousness to silence in the hosts. We also find that an increase  
66 in the parasitoid load decreases the stability of the host population, and the population dynam-  
67 ics become cyclic, chaotic and eventually go extinct. Our model will thus provide insights  
68 into the fundamental mechanisms that affect the evolution of acoustic signals in the presence  
69 of parasitoids.

## 70 **Model**

71 We begin by recapitulating an existing host-parasitoid insect population model [28]. The pop-  
72 ulation size of the host at a given time  $t$  is  $H_t$ , and the population size of the parasitoid is  $P_t$ .  
73 The proportion of parasitoid females in the population is  $q$ . Simultaneously,  $a$  is the search  
74 efficiency of the parasitoid and  $F_{max}$  is the maximum fecundity of the parasitoid. The repro-  
75 ductive rate of the host is represented by  $r$ . This model assumes that there are i)  $q$  proportion  
76 of parasitoid females, ii) a parasitoid female can examine area  $\alpha$  ("area of discovery") during  
77 its lifetime, and iii) there is a maximum parasitoid fecundity,  $F_{max}$ . The population dynamics  
78 of the host and parasitoid is given by:

$$\begin{aligned} H_{t+1} &= H_t \left( e^{-\frac{\alpha P_t F_{max}}{F_{max} + \alpha H_t}} \right) r \\ P_{t+1} &= H_t \left( 1 - e^{-\frac{\alpha P_t F_{max}}{F_{max} + \alpha H_t}} \right) q \end{aligned} \quad (1)$$

79 Ecologists have extensively used this particular approach to study parasitised insect pop-  
80 ulations. Host-parasitoid theoretical models typically generate oscillating populations of in-  
81 creasing amplitude and are by themselves unstable [29–31]. However, this does not accu-  
82 rately represent what happens in nature. In nature, additional ecological processes like in-  
83 traspecific competition and spatial heterogeneity can partially or completely stabilise the sys-  
84 tem. The model developed by Rogers provides a realistic depiction compared to Thompson's  
85 1922 model [28] and Nicholson and Bailey's 1935 model [32]. It is a further development of  
86 Holling's disc equation [33] including realised fecundity instead of a potential fecundity [28].

## 87 **Reproductive fitness of the host based on acoustic trait**

88 We assume that the signalling host's acoustic trait is represented by a single acoustic charac-  
89 ter, the syllable rate. While we have considered syllable rate for building the model, it can be

90 any feature of the acoustic signal like amplitude, frequency or intensity. We assume that the  
91 syllable rate,  $z$ , varies from 0 to 100 units in time. A chorus is formed when many individuals  
92 signal together with varying syllable rates. The chorus will thus have a mean syllable rate,  
93  $\bar{z}$ . A low syllable rate is when an individual has  $z < \bar{z}$ . A silent individual who does not  
94 signal is represented by  $z = 0$ , and a high syllable rate when  $z > \bar{z}$  indicates a conspicuous  
95 signaler. Given an environment devoid of acoustic interference, we can assume that the mean  
96 syllable rate,  $\bar{z}$ , sets the reproductive fitness standard for all calling individuals. If the syllable  
97 rate of a calling individual is higher than that of the chorus mean, then the individual stands  
98 out from the overall population, is conspicuous, and can be easily distinguished by listening  
99 mates. Therefore, it has a higher chance of securing more mates. We can model this as an  
100 individual caller, whose syllable rate is higher than that of the chorus' mean,  $z > \bar{z}$ , having a  
101 higher reproductive fitness component. While we assume that securing more mates increases  
102 the reproductive component of fitness, there is a maximum reproductive reward within a given  
103 time frame. The reproductive fitness with maximum reproductive reward is denoted by  $r_{max}$ .  
104 Hence, even when the individual's syllable reaches maximum conspicuousness, the reproduc-  
105 tive fitness component saturates at  $r_{max}$  (Fig. 1).

106 Similarly, suppose the syllable rate of a calling individual is lower than that of the chorus'  
107 mean. In that case, the chorus deafens the individual's signal, and therefore it has a lower  
108 chance of securing mates. So, we can model an individual whose syllable rate is lower than  
109 the chorus' mean,  $z < \bar{z}$ , with a lower reproductive fitness component. Nevertheless, we  
110 also assume that even if a caller is silent (a non-calling individual), it can encounter a mate  
111 by random chance, with its movement within the habitat. This gives the silent individual a  
112 minimum reproductive reward value,  $r_{min}$ . By  $\beta$  we denote the sensitivity of the reproductive  
113 curve, considered to be the phonotactic selectivity of the receiver citegerhardt2008phonotactic  
114 (Fig. 1). The reproductive component of fitness of an individual signaler is therefore given by:

$$r(z|\bar{z}) = r_{min} + \frac{r_{max} - r_{min}}{1 + e^{-\beta(z-\bar{z})}} \quad (2)$$

## 115 **Search efficiency of the parasitoid based on acoustic trait**

116 We then modelled the search efficiency with a type II functional response. Hence, as the  
117 syllable rate increases, the more conspicuous the individual is, the parasitoid can better find the  
118 signaller. After a certain threshold of the syllable rate, the search efficiency of the parasitoid  
119 saturates (Fig. 1). The search efficiency  $\alpha$  is,

$$\alpha = \frac{z}{1 + z} \quad (3)$$

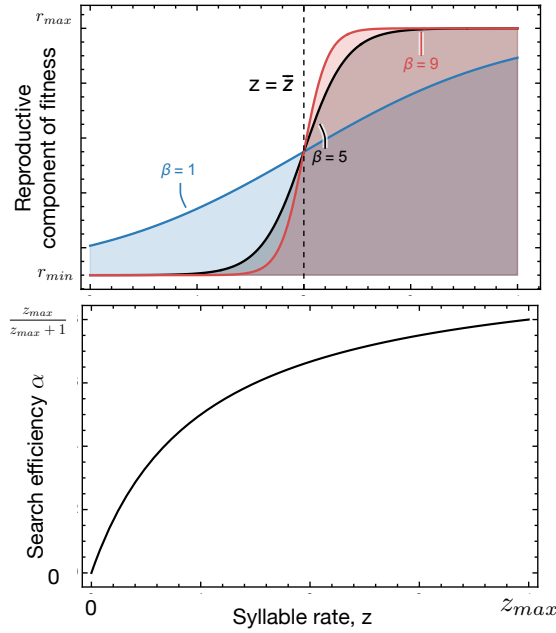

Figure 1: Reproductive component of fitness function of an individual host Eq. (2), Search efficiency (Eq. (3)) of a parasitoid as a function of mean chorus syllable rate. The reproductive component of fitness is dependent on how far the syllable rate of the individual,  $z$  is from the population chorus mean  $\bar{z}$ , and the phonotactic selectivity,  $\beta$ .  $r_{min}$  and  $r_{max}$  are the minimum and maximum reproductive rewards respectively. With high phonotactic selectivity there is a larger benefit in reproductive component of fitness. The search efficiency of the parasitoid,  $\alpha$ , increases with increase in host syllable rate and saturates at a high syllable rates.

## 120 Density dependence

121 We add density dependence to the insect population host-parasitoid framework. This entails  
 122 replacing the host's reproduction and search efficiency of the parasitoid with the newly for-  
 123 mulated acoustic character-based modifications. By substituting Eq. (2) and q. (3) in Eq. (1),  
 124 and adding density dependence with  $K$  being the carrying capacity of the habitat, we get:

$$\begin{aligned}
 H_{t+1} &= H_t e^{\underbrace{\left( r_{min} + \frac{r_{max} - r_{min}}{1 + e^{-\beta(z - \bar{z})}} \right) (1 - H_t / K) - \left( \frac{\frac{z}{1+z} P_t F_{max}}{F_{max} + \frac{z}{1+z} H_t} \right)}_{\text{prob. of esc. parasitism (density dependent)}}} \\
 P_{t+1} &= H_t \underbrace{\left( 1 - e^{-\frac{\frac{z}{1+z} P_t F_{max}}{F_{max} + \frac{z}{1+z} H_t}} \right)}_{\text{prob. of parasitism}} q
 \end{aligned} \tag{4}$$

## 125 **Simulation of the eco-evolutionary dynamics**

126 Because an analytical solution for the average fitness of the population  $\bar{w}(\bar{z})$  is intractable,  
127 we track changes in population abundance and the trait distributions of a cricket population  
128 with an individual-based model. As such, we numerically track the evolution of the full trait  
129 distribution of  $z$ , denoted by  $f(z)$ , over time, in addition to population size  $N(t)$ . Each time  
130 step represents a generation where all adults are assumed to die at the end of each time step  
131 such that generations are non-overlapping. Such dynamics are generally the case for cricket  
132 populations [34]; however, this assumption would not hold for many other acoustically sig-  
133 nalling organisms, including most bird species. Offspring inherit trait values from parents  
134 with variability  $\sigma$  such that,

$$z_{\text{offspring}}(t+1) = z_{\text{parent}}(t) + g, \quad (5)$$

135 where  $g \sim N(0, \phi)$ , and we set  $\phi = 1$ . The number offspring for each individual  $i$  with trait  
136  $z_i$  is determined by its fitness with respect to the chorus mean,  $w_i(z_i|\bar{z})$ , where the sum across  
137 reproducing individuals determines the future population size  $N(t+1)$ , such that

$$N(t+1) = \sum_{i=1}^{N(t)} w_i(z_i|\bar{z}). \quad (6)$$

138 We initiate the host population to be conspicuous  $\bar{z}(0) = 90$  with a standard deviation  
139 of  $\sigma = 10$ , and simulate dynamics over the course of 100 generations. We confirmed 100  
140 generations to be adequate for calculating steady-state conditions. We assumed steady state  
141 when the population density did not change more than  $\epsilon = 0.00001$  for more than 50 timesteps.  
142 We set  $r_{\min} = 0.01$ ,  $r_{\max} = 2\beta = 0.5$ , and  $K = 1000$ . The initial host population is  
143 represented in Fig. 2 ( $t = 1$ ).

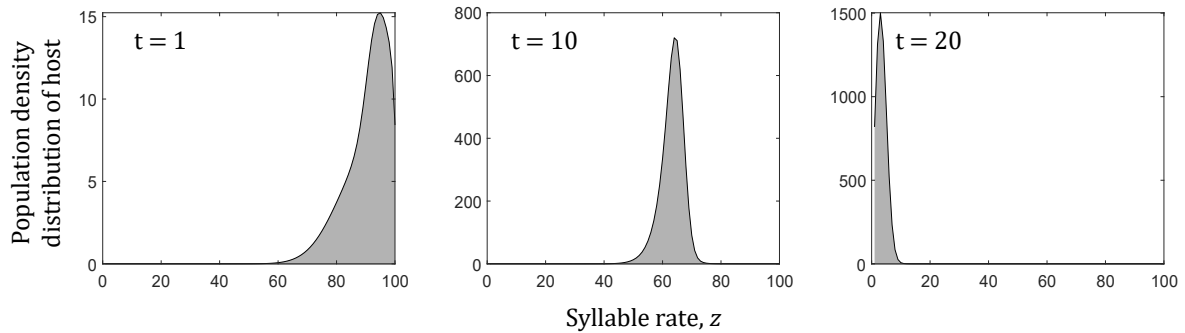

Figure 2: Initial distribution of the host population. With increasing generations, the host population evolves from a conspicuous chorus mean to a silent chorus mean within 20 generations. We see the evolution of silence within 20 generations in a population that has been attacked by parasitoids. The silent population has a higher population density.  $H(0) = 500$ ,  $\bar{z}(0) = 90$ ,  $\sigma = 10$ ,  $r_{min} = 0.01$ ,  $r_{max} = 2\beta = 0.5$ , and  $K = 1000$ .

## 144 Results

### 145 Quick transition from conspicuousness to silence

146 **Female biased sex-ratio.** As the proportion of parasitoid females increases, the conspicu-  
147 ously signalling population quickly evolves into silence. The reproductive fitness of the host  
148 individual is influenced by the chorus mean,  $\bar{z}$ . The conspicuous individuals' fitness is ini-  
149 tially high, resulting in reproductive gains. As the parasitoid females attack the conspicuous  
150 host individuals, mortality increases and the fitness of conspicuous individuals is reduced. In  
151 contrast, the silent host individuals escape parasitoid attack, reproduce, and increase the pro-  
152 portion of silent individuals in the host population in the next generation, reducing the chorus  
153 mean. With an increasing proportion of parasitoid females, there are more attacks on the con-  
154 spicuous hosts, and the evolution of silence is favoured (Fig. 3). This evolutionary transition is  
155 rapid, and it usually happens within ten generations in our study. The silent individuals survive  
156 and reproduce, increasing the population density to the carrying capacity (Fig. 3). Beyond a  
157 specific female parasitoid load, all the host individuals die, and the population goes extinct  
158 (Fig. 3). Thus a female-biased sex ratio of parasitoids influences the signalling trait evolution  
159 and drives population extinction of the host.

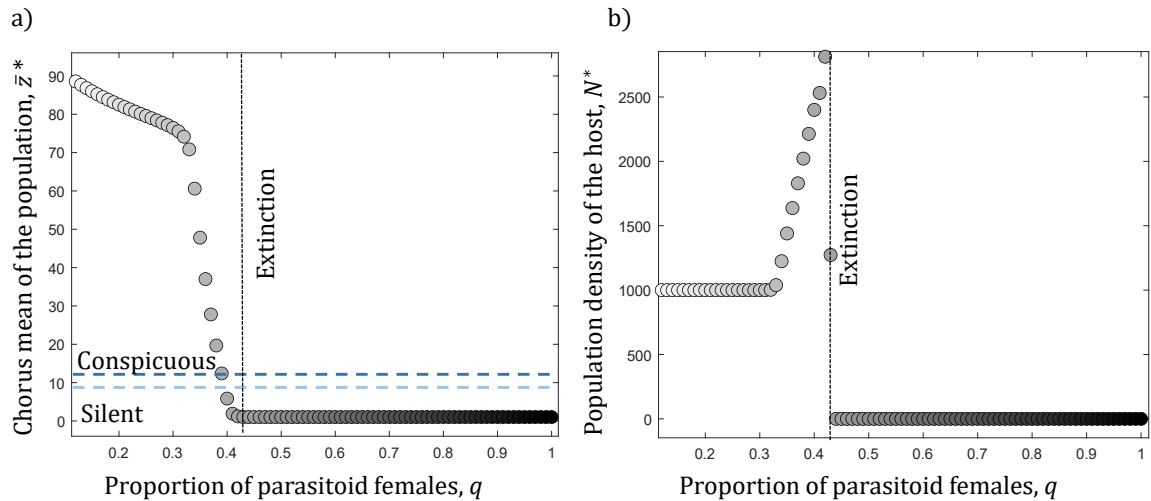

Figure 3: **Quick transition from conspicuous to silence.** a) Change in chorus mean of the host population represented by circle shapes. b) Change in population size of the host population. A more female-biased sex ratio in parasitoid populations results in a host population that is silent and large. Beyond a threshold of female-biased population in the parasitoids, the host population goes extinct.  $H(0) = 500$ ,  $\bar{z}(0) = 90$ ,  $\sigma = 10$ ,  $r_{min} = 0.01$ ,  $r_{max} = 2$ ,  $\beta = 0.5$ ,  $F_{max} = 3$  and  $K = 1000$ .

160 **Parasitoid fecundity influences the signalling trait evolution and population dynamics of**  
161 **the host** As the maximum number of viable offspring of the parasitoid females increases,  
162 the conspicuously signalling population abruptly transitions to silence (Fig. 4). The increase  
163 in parasitoid fecundity increases their population density in the next generation. This results  
164 in more number of attacks on conspicuous hosts. The conspicuous individuals die, and the  
165 proportion of silent individuals increases in the population, driving the chorus mean to silence.  
166 This evolutionary transition of the host is rapid and occurs within ten generations. As we  
167 further increase the fecundity of parasitoids, the population goes extinct (Fig. 4).



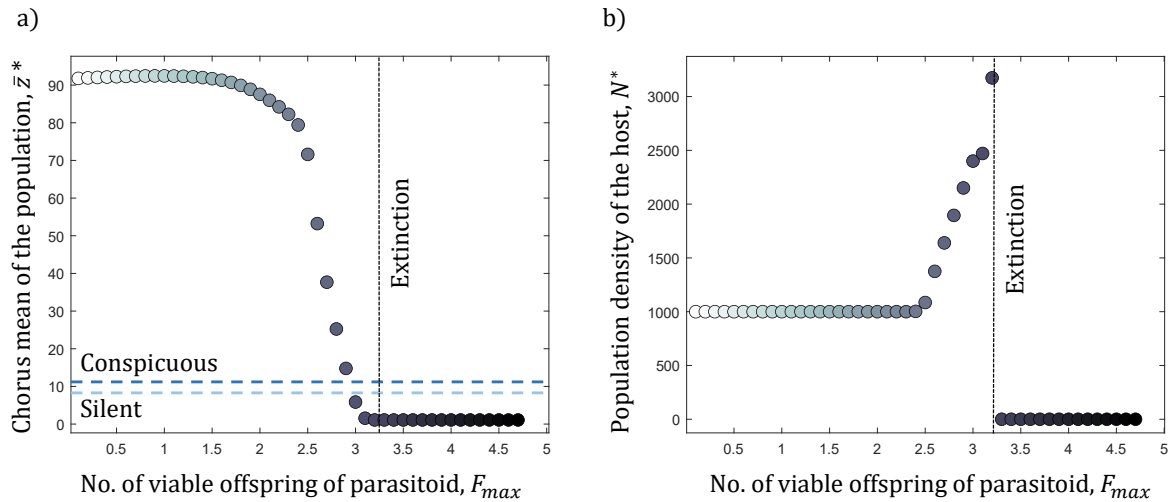

Figure 4: **Quick transition from conspicuous to silence.** a) Change in chorus mean of the host population. b) Change in population size of the host population. Increase in the fecundity of parasitoid females results in a host population that is silent and large. Beyond a threshold of fecundity of the female parasitoids, the host population goes extinct.  $H(0) = 500$ ,  $\bar{z}(0) = 90$ ,  $\sigma = 10$ ,  $r_{min} = 0.01$ ,  $r_{max} = 2$ ,  $\beta = 0.5$ ,  $q = 0.4$  and  $K = 1000$ .

## 168 **Stability of the system and bifurcation analysis**

169 The reproductive incentive to signal is given by the difference in the maximum reproductive  
 170 fitness  $r_{max}$  and the minimum reproductive reward  $r_{min}$ . Keeping the reproductive reward  
 171 constant at a low value,  $r_{min} = 0.01$ , as we increase the maximum reproductive fitness, we  
 172 increase the reproductive incentive. With the increase in reproductive incentive to signal,  
 173 multiple population steady-state values emerge, such that the host population enters cyclic  
 174 oscillations. We first see period-doubling in the host population density as the reproductive  
 175 incentive increases. With a high reproductive incentive, the population size is similarly high.  
 176 The costs of overpopulation are then determined by the carrying capacity, driving the pop-  
 177 ulation extinct. The stability of the system and the start of period-doubling changes with  
 178 parasitoid load. As we increase the parasitoid load (increasing fecundity or the proportion of  
 179 females), the populations go extinct Fig. 5.

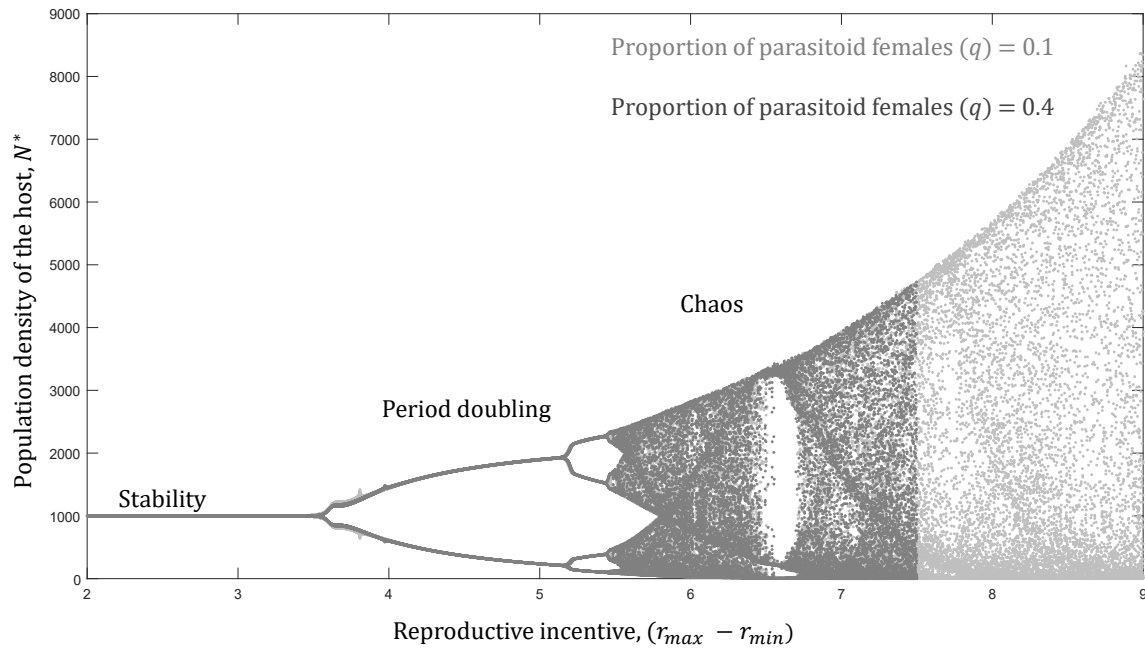

Figure 5: **Bifurcation diagram of the host system.** Outcome of host population when parasitoid population is male-biased shown in light grey and female-biased shown in dark grey. A female-biased parasitoid population causes the host population to be less stable and drive it towards extinction sooner.

180 We also plotted the chorus mean and the size of the host population for a varying sex ratio  
 181 and fecundity of the parasitoid (Fig. 6). When the parasitoid population is more male or  
 182 female biased, and the fecundity of the parasitoid is low, the host population remains conspicu-  
 183 ous. If the sex ratio relatively is male-biased, but there is high fecundity, then the population  
 184 is polymorphic with a mix of singing and silence. The host population goes extinct with a  
 185 female-biased sex ratio and high fecundity (Table. 1). The system is less stable and pushed to-  
 186 wards chaos for a female-biased parasitoid population with high fecundity and the population  
 187 is subsequently driven to extinction.

| Parasitoid Condition |           | Host Outcome |                    |
|----------------------|-----------|--------------|--------------------|
| Sex-ratio            | Fecundity | Chorus       | Population density |
| Male-biased          | Low       | Conspicuous  | High               |
| Male-biased          | High      | Intermediate | Intermediate       |
| Female-biased        | Low       | Conspicuous  | High               |
| Female-biased        | High      | Silent       | Low                |

Table 1: Effect of parasitoid condition on the host population

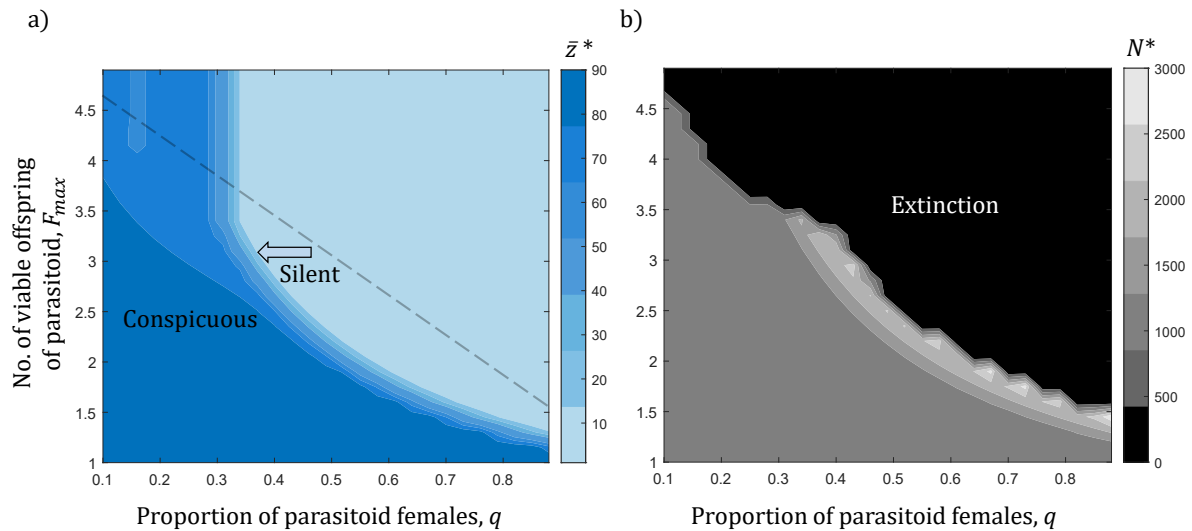

Figure 6: Stability analysis of the host system a) Chorus mean of the host population. Dark blue represents a conspicuous population and light blue represents a silent population. The blue transparent dashed line shows approximate extinction in population. Anything above the line is extinction and not silence. b) Population size of the host population. A high parasitoid load, pushes the host population to silence with a high population density. Beyond, a certain threshold of parasitoid load, the population enters cycles, followed by chaos, and then goes extinct.  $H(0) = 500$ ,  $\bar{z}(0) = 90$ ,  $\sigma = 10$ ,  $r_{min} = 0.01$ ,  $r_{max} = 2$ ,  $\beta = 0.5$ , and  $K = 1000$ .

## 188 Discussion

189 Acoustic signal evolution can result from diversification of the signal [35], amplification of  
 190 the existing signal to a conspicuous population [35], diminishing of a signal  
 191 into a silent population [36] and, loss of signal by a morphological change in the signal pro-  
 192 ducing organ [23], loss of preference for conspicuous signalers from the receiver [37]. This  
 193 evolution of the acoustic signal can be a result of population dynamics [38, 39], and environ-  
 194 mental pressures [40]. Parasitism is one of the major drivers of diminishing acoustic signals in  
 195 various signalling species [41]. Several empirical studies have shown that with an increase in  
 196 parasitoid load, the acoustic signal is diminished and lost within a few generations [25, 42, 43]  
 197 Various aspects of the effect of parasitoids on host signalling traits and population sizes have  
 198 been documented [41, 44]. As discussed previously, the existing host-parasitoid models do not  
 199 predict the host's trait evolution and only focus on the population densities [28, 31, 32]. We  
 200 modelled the parasitoid load, its impacts on the host population densities, and their signalling  
 201 trait evolution. We have elucidated the critical components of the parasitoid load that affect

202 the host population and identify the threshold load at which the host population responds by  
203 the loss of the signal and evolution of silence.

204 Our results show that the sex ratio and the fecundity of the parasitoid population play a key  
205 role in the switch from conspicuousness to silence. Specifically, the sex ratio and fecundity  
206 in the parasitoid population drive the signalling trait evolution, which in turn influences host  
207 population dynamics and stability (Fig. 3, Fig. 4, and Fig. 5). The evolution from conspicu-  
208 ousness to silence occurs within ten generations. Empirical studies corroborate these results.  
209 Among field crickets, it is known that signalling males are more affected by the parasitoid fly  
210 of the genus *Ormia* [18]. Female parasitoid flies find a specific cricket host depositing their  
211 parasitoid offspring. The offspring then grow and feed within the host. Within ten days, the  
212 fully grown larvae kill the host as they emerge [45]. Therefore one would estimate that the  
213 sex ratio in parasitoid populations and the offspring size play vital roles in shaping the host's  
214 survival and signalling behaviour. Our results show that the increasing female-biased sex ratio  
215 and fecundity quickly drive the populations to evolve silence. Zuk *et al.* (2006) showed that on  
216 the Hawaiian island of Kauai, where there was high parasitoid density, most of the population  
217 evolved silence through selection for a flatwing morphology that rendered the males incapable  
218 of generating an acoustic signal within twenty generations. To reproduce, they used alterna-  
219 tive mating strategies such as increased locomotive behaviour to encounter females randomly  
220 [44]. The resulting rapid and short transition period towards silence conforms with the results  
221 of our model.

222 A high reproductive incentive causes the host population destabilization, period doubling,  
223 chaos, and extinction (Fig. 5). Population densities of the host can be highly susceptible, and  
224 the risk of infection increases with parasitoid density [46, 47]. When subject to varying preda-  
225 tor densities, Allee effects or parasitism, fast-growing populations are highly sensitive to initial  
226 population densities [48]. Such populations can exhibit chaotic dynamics that may promote  
227 extinction risk [49–53]. We show that the reproductive rate drives the population expansion,  
228 stability, and ultimately extinction (Fig. 5). Our results corroborate natural observations of  
229 rapidly growing populations which first thrive, reach a critical threshold, exhibit chaotic dy-  
230 namics and then go extinct [49, 54, 55]. Also, rapid oscillations in population densities can  
231 lead to species extinction [56]. Such oscillations are dictated by the reproductive incentive,  
232 moulded by the parasitoid load. An increased parasitoid load pushes the system faster toward  
233 instability (Fig. 5). This observation implies a threshold beyond which parasitoid load cannot  
234 increase in nature as it drives the host population extinct.

235 Empirical studies have independently shown that parasitoids cause shifts in host traits [15].  
236 Theoretical models and other empirical findings also point to the effects of parasitoids on host  
237 populations [28, 31, 32]. We outline the missing link: the connection between the parasitoid

238 load, acoustic trait evolution and population density. One would expect the parasitoids first  
239 to change the host population density and the evolution of silence to be a response to the  
240 population change. Counter-intuitively, we show that the parasitoid load first alters the repro-  
241 ductive rate of the host population, causing an evolutionary signal adaptation in the host. The  
242 population density then responds to this evolutionary signal adaptation (Fig. 6).

243 Our model provides a general framework for organisms that use acoustic signals to se-  
244 cure mates and exploited by predators or parasitoids. This framework to predict the signal  
245 evolution change applies to crickets, cicadas, anurans, sparrows, etc. Further, the model can  
246 be expanded and developed to understand the effects of parasitism on host sex ratios [57].  
247 The model could also be further developed to understand the evolution of multi-component  
248 auditory signals, anthropogenic effects, and specifically to climate change acoustic behaviour  
249 distributions [58–60]. Changes in the environment can cause significant changes in the re-  
250 productive incentive of signalers [40, 61, 62]. Changes in the environment can also shift the  
251 parasitoid load [63]. At different parasitoid loads, we have shown that drastic changes in evo-  
252 lutionary adaptations of signalling hosts and their population stability are possible for a given  
253 reproductive incentive. Together with environmental conditions that alter the reproductive in-  
254 centive and parasitoid load, our model’s findings can provide insight into their reproduction,  
255 trait evolution and population densities. In future studies, we aim to leverage our findings  
256 to develop strategies for conserving the acoustic communicating populations under changing  
257 environmental conditions. Artificial manipulation of the parasitoid population size, sex ratios,  
258 and fecundity may provide a path forward.

259 **Acknowledgements.** We thank Irina Birskis-Barros, Taran Rallings, and Ritwika VPS  
260 for their helpful comments and suggestions. This manuscript benefited from University of  
261 California, Merced’s School of Natural Sciences Dean Fellowship. Chaitanya S. Gokhale  
262 acknowledges funding from the Max Planck Society.

263 **Data Availability and Analysis.** All code and preliminary plots are available on GitHub  
264 at <https://github.com/meghasr92/parasitismsilence>.

265 **Code availability.** <https://github.com/meghasr92/parasitismsilence>.

## 266 **References**

- 267 [1] Chen, Z. & Wiens, J. J. The origins of acoustic communication in vertebrates. *Nature*  
268 *communications* **11**, 1–8 (2020).
- 269 [2] Gerhardt, H. C. & Huber, F. Acoustic communication in insects and anurans: common  
270 problems and diverse solutions (2003).

- 271 [3] Kumar, A. Acoustic communication in birds. *Resonance* **8**, 44–55 (2003).
- 272 [4] Hedwig, B. Insect hearing and acoustic communication (2014).
- 273 [5] Nokelainen, O., Hegna, R. H., Reudler, J. H., Lindstedt, C. & Mappes, J. Trade-off  
274 between warning signal efficacy and mating success in the wood tiger moth. *Proceedings*  
275 *of the Royal Society B: Biological Sciences* **279**, 257–265 (2012).
- 276 [6] Penn, D. & Potts, W. K. Chemical signals and parasite-mediated sexual selection. *Trends*  
277 *in Ecology & Evolution* **13**, 391–396 (1998).
- 278 [7] Stevens, M. *Sensory ecology, behaviour, and evolution* (Oxford University Press, 2013).
- 279 [8] Barbosa, F., Rebar, D. & Greenfield, M. D. Reproduction and immunity trade-offs con-  
280 strain mating signals and nuptial gift size in a bushcricket. *Behavioral Ecology* **27**, 109–  
281 117 (2016).
- 282 [9] Wollerman, L. & Wiley, R. H. Background noise from a natural chorus alters female  
283 discrimination of male calls in a neotropical frog. *Animal Behaviour* **63**, 15–22 (2002).
- 284 [10] Vélez, A., Schwartz, J. J. & Bee, M. A. Anuran acoustic signal perception in noisy  
285 environments. In *Animal communication and noise*, 133–185 (Springer, 2013).
- 286 [11] Parris, K. M., Velik-Lord, M. & North, J. M. Frogs call at a higher pitch in traffic noise.  
287 *Ecology and Society* **14** (2009).
- 288 [12] Slabbekoorn, H. & Peet, M. Birds sing at a higher pitch in urban noise. *Nature* **424**,  
289 267–267 (2003).
- 290 [13] Searcy, W. A. & Andersson, M. Sexual selection and the evolution of song. *Annual*  
291 *Review of Ecology and Systematics* **17**, 507–533 (1986).
- 292 [14] Otter, K., Chruszcz, B. & Ratcliffe, L. Honest advertisement and song output during the  
293 dawn chorus of black-capped chickadees. *Behavioral Ecology* **8**, 167–173 (1997).
- 294 [15] Zuk, M. & Kolluru, G. R. Exploitation of sexual signals by predators and parasitoids.  
295 *The Quarterly Review of Biology* **73**, 415–438 (1998).
- 296 [16] Chapman, R. F. & Chapman, R. F. *The insects: structure and function* (Cambridge  
297 university press, 1998).
- 298 [17] Cade, W. Acoustically orienting parasitoids: fly phonotaxis to cricket song. *Science* **190**,  
299 1312–1313 (1975).

- 300 [18] Robert, D., Amoroso, J. & Hoy, R. R. The evolutionary convergence of hearing in a  
301 parasitoid fly and its cricket host. *Science* **258**, 1135–1137 (1992).
- 302 [19] Adamo, S., Robert, D. & Hoy, R. Effects of a tachinid parasitoid, *ormia ochracea*, on  
303 the behaviour and reproduction of its male and female field cricket hosts (*gryllus* spp).  
304 *Journal of Insect Physiology* **41**, 269–277 (1995).
- 305 [20] Heinen-Kay, J. L. & Zuk, M. When does sexual signal exploitation lead to signal loss?  
306 *Frontiers in Ecology and Evolution* **7**, 255 (2019).
- 307 [21] Rüppell, O. & Heinze, J. Alternative reproductive tactics in females: the case of size  
308 polymorphism in winged ant queens. *Insectes Sociaux* **46**, 6–17 (1999).
- 309 [22] Ellers, J. & Liefting, M. Extending the integrated phenotype: Covariance and correlation  
310 in plasticity of behavioural traits. *Current Opinion in Insect Science* **9**, 31–35 (2015).
- 311 [23] Zuk, M., Rotenberry, J. T. & Tinghitella, R. M. Silent night: adaptive disappearance of  
312 a sexual signal in a parasitized population of field crickets. *Biology letters* **2**, 521–524  
313 (2006).
- 314 [24] Rotenberry, J. T. & Zuk, M. Alternative reproductive tactics in context: how demogra-  
315 phy, ecology, and behavior affect male mating success. *The American Naturalist* **188**,  
316 582–588 (2016).
- 317 [25] Wilkins, M. R., Seddon, N. & Safran, R. J. Evolutionary divergence in acoustic signals:  
318 causes and consequences. *Trends in ecology & evolution* **28**, 156–166 (2013).
- 319 [26] Tinghitella, R. Rapid evolutionary change in a sexual signal: genetic control of the mu-  
320 tation ‘flatwing’ that renders male field crickets (*teleogryllus oceanicus*) mute. *Heredity*  
321 **100**, 261–267 (2008).
- 322 [27] Lehmann, G. U. & Lakes-Harlan, R. Adaptive strategies in life-history of bushcrickets  
323 (*orthoptera*) and cicadas (*homoptera*) to parasitoids pressure on their acoustic communi-  
324 cation systems—a case for sociality? *Frontiers in Ecology and Evolution* **7**, 295 (2019).
- 325 [28] Rogers, D. Random search and insect population models. *The Journal of Animal Ecology*  
326 369–383 (1972).
- 327 [29] Jansen, V. A. The dynamics of two diffusively coupled predator–prey populations. *The-*  
328 *oretical Population Biology* **59**, 119–131 (2001).

- 329 [30] Briggs, C. J. & Hoopes, M. F. Stabilizing effects in spatial parasitoid–host and predator–  
330 prey models: a review. *Theoretical population biology* **65**, 299–315 (2004).
- 331 [31] May, R. M. Stability and complexity in model ecosystems. In *Stability and Complexity*  
332 *in Model Ecosystems* (Princeton university press, 2019).
- 333 [32] Nicholson, A. J. & Bailey, V. A. The balance of animal populations.—part i. In *Pro-*  
334 *ceedings of the zoological society of London*, vol. 105, 551–598 (Wiley Online Library,  
335 1935).
- 336 [33] Holling, C. S. Some characteristics of simple types of predation and parasitism1. *The*  
337 *canadian entomologist* **91**, 385–398 (1959).
- 338 [34] Masson, M. V. *et al.* Bioecological aspects of the common black field cricket, gryllus  
339 assimilis (orthoptera: Gryllidae) in the laboratory and in eucalyptus (myrtaceae) planta-  
340 tions. *Journal of Orthoptera Research* **29**, 83–89 (2020).
- 341 [35] Symes, L., Ayres, M., Cowdery, C. & Costello, R. Signal diversification in oecanthus  
342 tree crickets is shaped by energetic, morphometric, and acoustic trade-offs. *Evolution*  
343 **69**, 1518–1527 (2015).
- 344 [36] Gray, B., Bailey, N. W., Poon, M. & Zuk, M. Multimodal signal compensation: do field  
345 crickets shift sexual signal modality after the loss of acoustic communication? *Animal*  
346 *behaviour* **93**, 243–248 (2014).
- 347 [37] Bailey, N. W. & Zuk, M. Acoustic experience shapes female mate choice in field crickets.  
348 *Proceedings of the Royal Society B: Biological Sciences* **275**, 2645–2650 (2008).
- 349 [38] von Helversen, D., von Helversen, O. & Heller, K.-G. When to give up responding  
350 acoustically in poecilimon bushcrickets: a clue to population density. *Articulata* **27**,  
351 57–66 (2012).
- 352 [39] Reichard, D. G. & Anderson, R. C. Why signal softly? the structure, function and  
353 evolutionary significance of low-amplitude signals. *Animal Behaviour* **105**, 253–265  
354 (2015).
- 355 [40] Bowen, A. E., Gurule-Small, G. A. & Tinghitella, R. M. Anthropogenic noise reduces  
356 male reproductive investment in an acoustically signaling insect. *Behavioral Ecology*  
357 *and Sociobiology* **74**, 1–8 (2020).



- 358 [41] Kolluru, G. R. *The effects of an acoustically-orienting parasitoid fly *Ormia ochracea* on*  
359 *reproduction in the field cricket, *Teleogryllus oceanicus*: a trade-off between natural and*  
360 *sexual selection* (University of California, Riverside, 1999).
- 361 [42] Garamszegi, L. Z. Bird song and parasites. *Behavioral Ecology and Sociobiology* **59**,  
362 167–180 (2005).
- 363 [43] Rayner, J., Aldridge, S., Montealegre-Z, F. & Bailey, N. W. A silent orchestra: conver-  
364 gent song loss in hawaiian crickets is repeated, morphologically varied, and widespread.  
365 *Ecology* (2019).
- 366 [44] Balenger, S. L. & Zuk, M. Roaming romeos: male crickets evolving in silence show  
367 increased locomotor behaviours. *Animal Behaviour* **101**, 213–219 (2015).
- 368 [45] Zukl, M., Simmons, L. W. & Cupp, L. Calling characteristics of parasitized and unpar-  
369 asitized populations of the field cricket *teleogryllus oceanicus*. *Behavioral Ecology and*  
370 *Sociobiology* **33**, 339–343 (1993).
- 371 [46] Anderson, R. M. & May, R. M. Regulation and stability of host-parasite population  
372 interactions: I. regulatory processes. *The journal of animal ecology* 219–247 (1978).
- 373 [47] Steinhaus, E. A. Crowding as a possible stress factor in insect disease. *Ecology* 503–514  
374 (1958).
- 375 [48] Hart, E. M. & Avilés, L. Reconstructing local population dynamics in noisy metapopu-  
376 lations—the role of random catastrophes and allee effects. *PloS one* **9**, e110049 (2014).
- 377 [49] Schreiber, S. J. Allee effects, extinctions, and chaotic transients in simple population  
378 models. *Theoretical population biology* **64**, 201–209 (2003).
- 379 [50] Hastings, A. Transients: the key to long-term ecological understanding? *Trends in*  
380 *ecology & evolution* **19**, 39–45 (2004).
- 381 [51] Gokhale, C. S., Papkou, A., Traulsen, A. & Schulenburg, H. Lotka-Volterra dynamics  
382 kills the Red Queen: population size fluctuations and associated stochasticity dramati-  
383 cally change host-parasite coevolution. *BMC Evolutionary Biology* **13**, 254 (2013).
- 384 [52] Schenk, H., Traulsen, A. & Gokhale, C. S. Chaotic provinces in the kingdom of the Red  
385 Queen. *Journal of Theoretical Biology* **431**, 1–10 (2017).
- 386 [53] Hastings, A. *et al.* Transient phenomena in ecology. *Science* **361** (2018).

- 387 [54] Sinha, S. & Parthasarathy, S. Unusual dynamics of extinction in a simple ecological  
388 model. *Proceedings of the National Academy of Sciences* **93**, 1504–1508 (1996).
- 389 [55] Schreiber, S. J. Chaos and population disappearances in simple ecological models. *Jour-*  
390 *nal of Mathematical Biology* **42**, 239–260 (2001).
- 391 [56] Misra, J. & Mitra, A. Instabilities in single-species and host-parasite systems: period-  
392 doubling bifurcations and chaos. *Computers & Mathematics with Applications* **52**, 525–  
393 538 (2006).
- 394 [57] Venkateswaran, V. R., Roth, O. & Gokhale, C. S. Consequences of combining sex-  
395 specific traits. *Evolution* **75**, 1274–1287 (2021).
- 396 [58] Laiolo, P. The emerging significance of bioacoustics in animal species conservation.  
397 *Biological conservation* **143**, 1635–1645 (2010).
- 398 [59] Roca, I. T. *et al.* Shifting song frequencies in response to anthropogenic noise: a meta-  
399 analysis on birds and anurans. *Behavioral Ecology* **27**, 1269–1274 (2016).
- 400 [60] Desjonquères, C. *et al.* Acoustic species distribution models (asdms): A framework  
401 to forecast shifts in calling behaviour under climate change. *Methods in Ecology and*  
402 *Evolution* (2022).
- 403 [61] Nabi, G. *et al.* The possible effects of anthropogenic acoustic pollution on marine mam-  
404 mals’ reproduction: an emerging threat to animal extinction. *Environmental science and*  
405 *pollution research* **25**, 19338–19345 (2018).
- 406 [62] Lengagne, T. Traffic noise affects communication behaviour in a breeding anuran, hyla  
407 arborea. *Biological conservation* **141**, 2023–2031 (2008).
- 408 [63] Phillips, J. N., Ruef, S. K., Garvin, C. M., Le, M.-L. T. & Francis, C. D. Background  
409 noise disrupts host–parasitoid interactions. *Royal Society open science* **6**, 190867 (2019).
